# Supplementary material
Source: PubMed Central journal article supplement (PMC6836722)
Supplement: NIHMS1046335-supplement-Supp_info.pdf [file NIHMS1046335-supplement-Supp_info.pdf]

## Supplementary Materials

Table S1: Cutoffs for BF corresponding to type I error rate of 0.01 obtained from simulated data ( $\rho = 0, 0.3, 0.7, \text{ and } 0.99$ ) and GAW19 data on ULK4 and ZNF280D genes ( $\rho = 0.55$ ). A cutoff is obtained for each combination of Freq, # Hap, and  $\rho$  values. A haplotype is considered rare if its frequency is less than or equal to 0.02.

| Method         | Freq   | # Hap    | $\rho = 0, 0.3$ | $\rho = 0.55, 0.7, 0.99$ |
|----------------|--------|----------|-----------------|--------------------------|
| Bivariate LBL  | rare   | $\leq 8$ | 3.54            | 2.33                     |
|                | rare   | $> 8$    | 1.97            | 1.67                     |
|                | common | $\leq 8$ | 0.64            | 0.71                     |
|                | common | $> 8$    | 0.83            | 0.68                     |
| Univariate LBL | rare   | $\leq 8$ | 9.17            | 5.18                     |
|                | rare   | $> 8$    | 6.16            | 4.68                     |
|                | common | $\leq 8$ | 2.92            | 3.43                     |
|                | common | $> 8$    | 3.42            | 3.22                     |

Freq: Haplotype frequency, # Hap: Number of haplotypes in the window/block

Table S2: Empirical type I error rates (in %) calculated using the simulated data. Cutoffs for BF used for declaring significance correspond to type I error rate of 1% and are listed in Table S1.

| Setting | Haplotype | Freq  | $\rho = 0$ | $\rho = 0.3$ | $\rho = 0.7$ | $\rho = 0.99$ |
|---------|-----------|-------|------------|--------------|--------------|---------------|
| 1       | h01100    | 0.300 | 0.2        | 0.2          | 0.2          | 0.2           |
| 1       | h10100    | 0.005 | 1.2        | 0.6          | 1.6          | 1.2           |
| 1       | h11011    | 0.010 | 0.9        | 1.1          | 1.2          | 0.8           |
| 1       | h11100    | 0.155 | 0.5        | 0.5          | 0.3          | 0.5           |
| 1       | h11111    | 0.110 | 1.0        | 0.8          | 1.5          | 0.3           |
| 2       | h01010    | 0.060 | 1.9        | 1.3          | 1.4          | 0.7           |
| 2       | h01100    | 0.250 | 0.4        | 0.3          | 0.0          | 0.0           |
| 2       | h10000    | 0.080 | 1.6        | 0.8          | 0.7          | 0.9           |
| 2       | h10100    | 0.005 | 0.7        | 1.0          | 1.1          | 0.3           |
| 2       | h11011    | 0.010 | 1.5        | 0.6          | 0.6          | 0.3           |
| 2       | h11100    | 0.090 | 1.9        | 1.4          | 0.6          | 0.4           |
| 2       | h11101    | 0.085 | 1.0        | 1.3          | 0.6          | 0.6           |
| 2       | h11111    | 0.100 | 0.6        | 0.5          | 0.2          | 0.5           |
| 3       | h00111    | 0.070 | 0.9        | 1.4          | 0.7          | 0.4           |
| 3       | h01000    | 0.020 | 0.6        | 1.0          | 0.6          | 0.3           |
| 3       | h01011    | 0.050 | 1.2        | 1.4          | 1.2          | 1.0           |
| 3       | h01101    | 0.060 | 1.3        | 1.8          | 1.1          | 0.2           |
| 3       | h01110    | 0.140 | 0.9        | 0.2          | 0.3          | 0.1           |
| 3       | h10010    | 0.080 | 1.0        | 1.1          | 0.8          | 0.4           |
| 3       | h10100    | 0.005 | 1.0        | 1.1          | 0.6          | 0.1           |
| 3       | h11011    | 0.010 | 1.3        | 0.9          | 0.9          | 0.2           |
| 3       | h11101    | 0.090 | 1.2        | 0.7          | 0.9          | 0.1           |
| 3       | h11110    | 0.130 | 0.8        | 0.4          | 0.4          | 0.3           |
| 3       | h11111    | 0.100 | 1.1        | 0.7          | 0.3          | 0.1           |

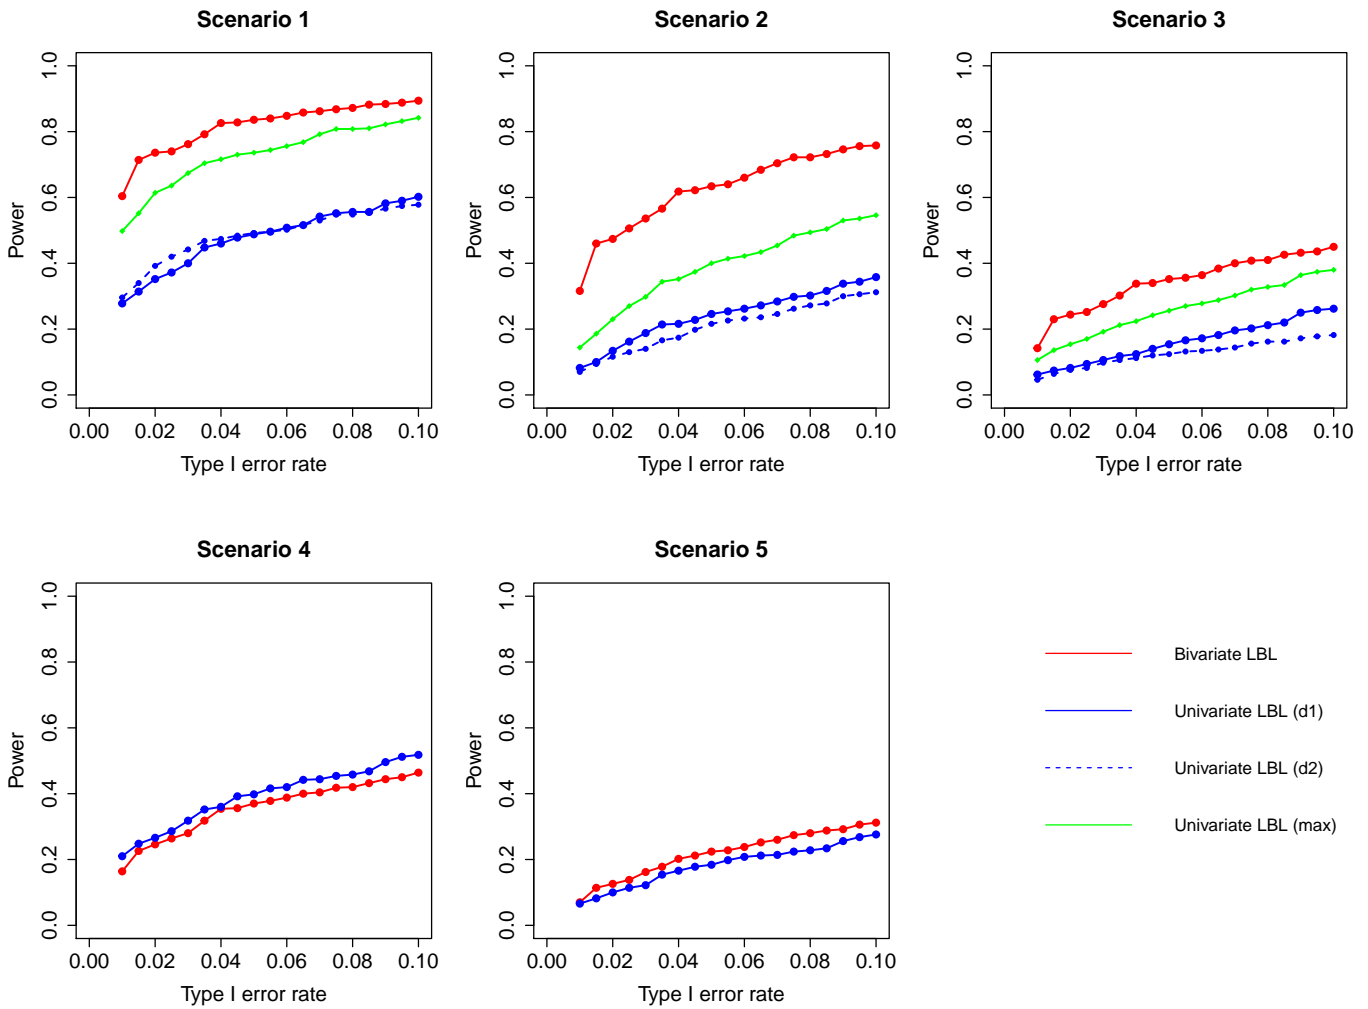

Figure S1: Simulation results for hypothesis 1 under setting 2 (9 haplotypes) and  $\rho = 0$ . The scenarios are listed in Table 1. d1=disease 1, d2=disease 2.

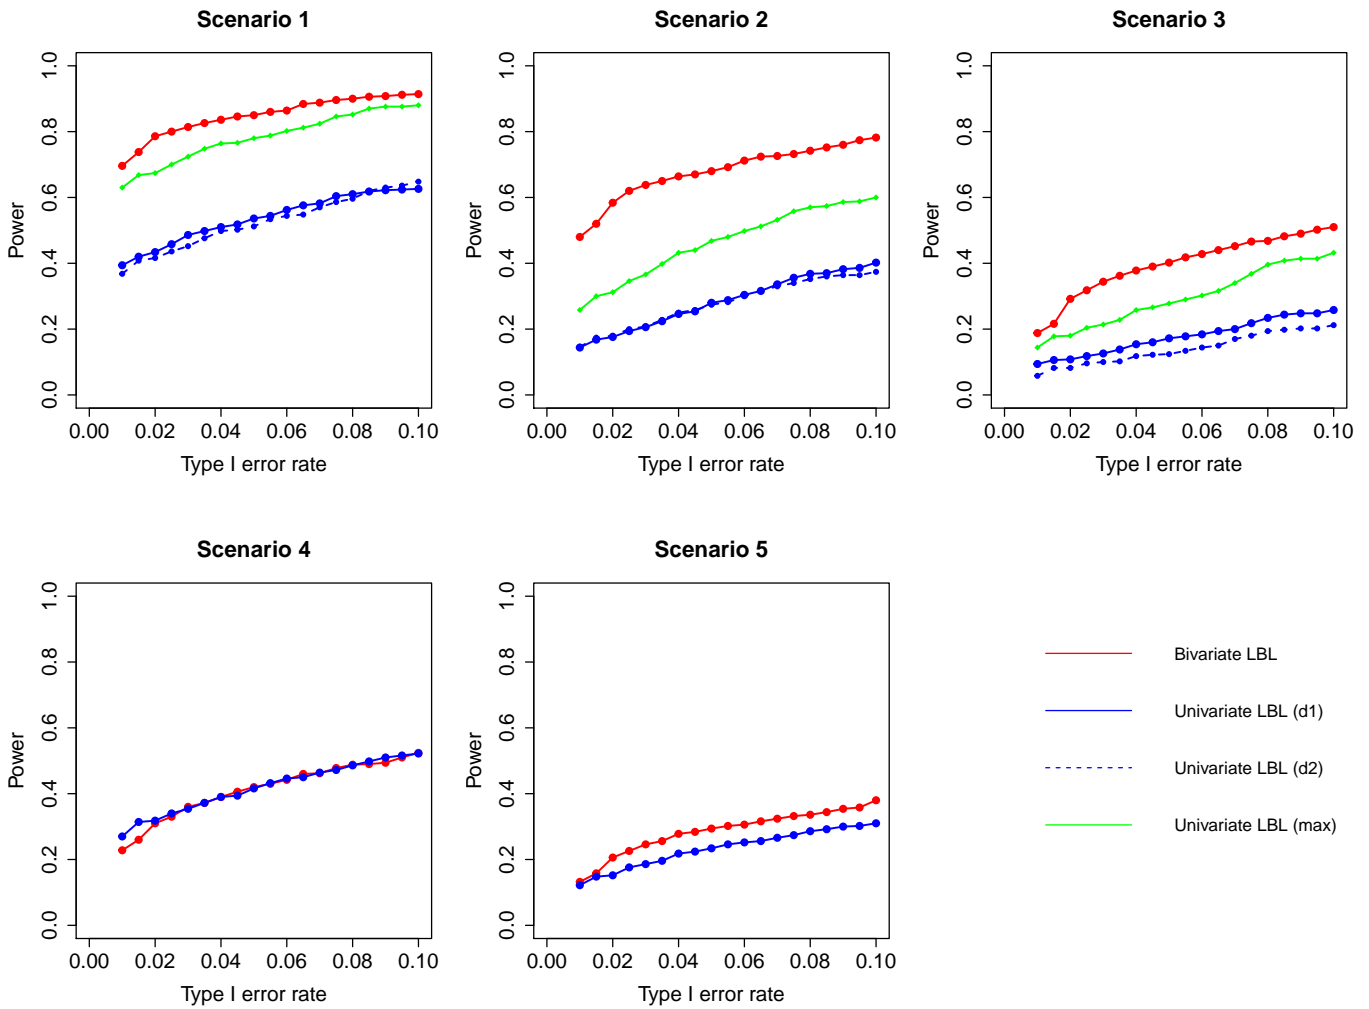

Figure S2: Simulation results for hypothesis 1 under setting 2 (9 haplotypes) and  $\rho = 0.3$ . The scenarios are listed in Table 1. d1=disease 1, d2=disease 2.

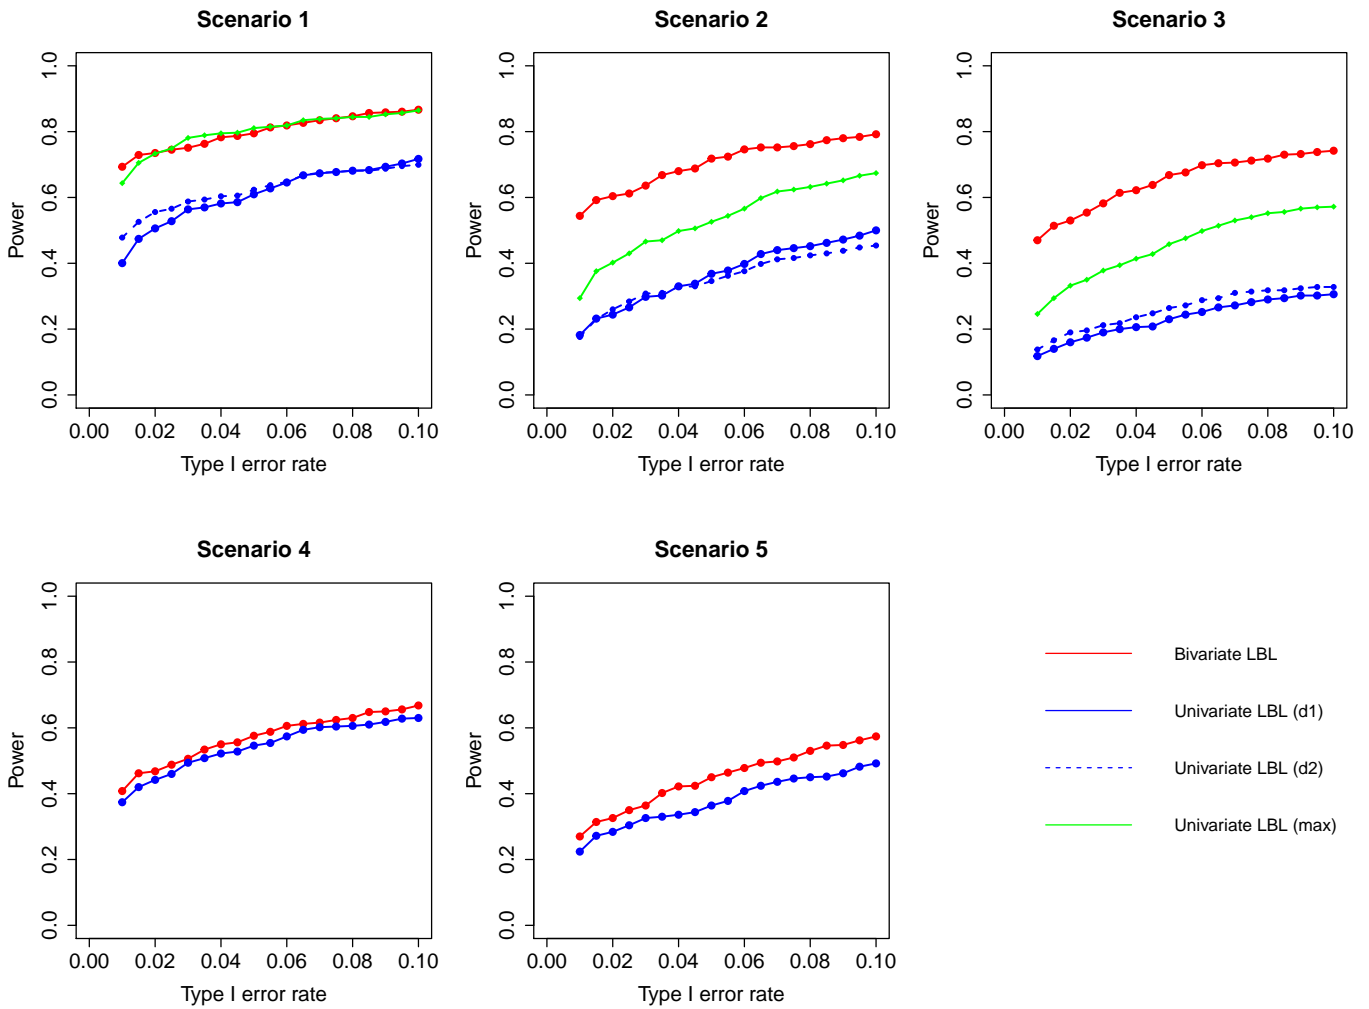

Figure S3: Simulation results for hypothesis 1 under setting 2 (9 haplotypes) and  $\rho = 0.7$ . The scenarios are listed in Table 1. d1=disease 1, d2=disease 2.

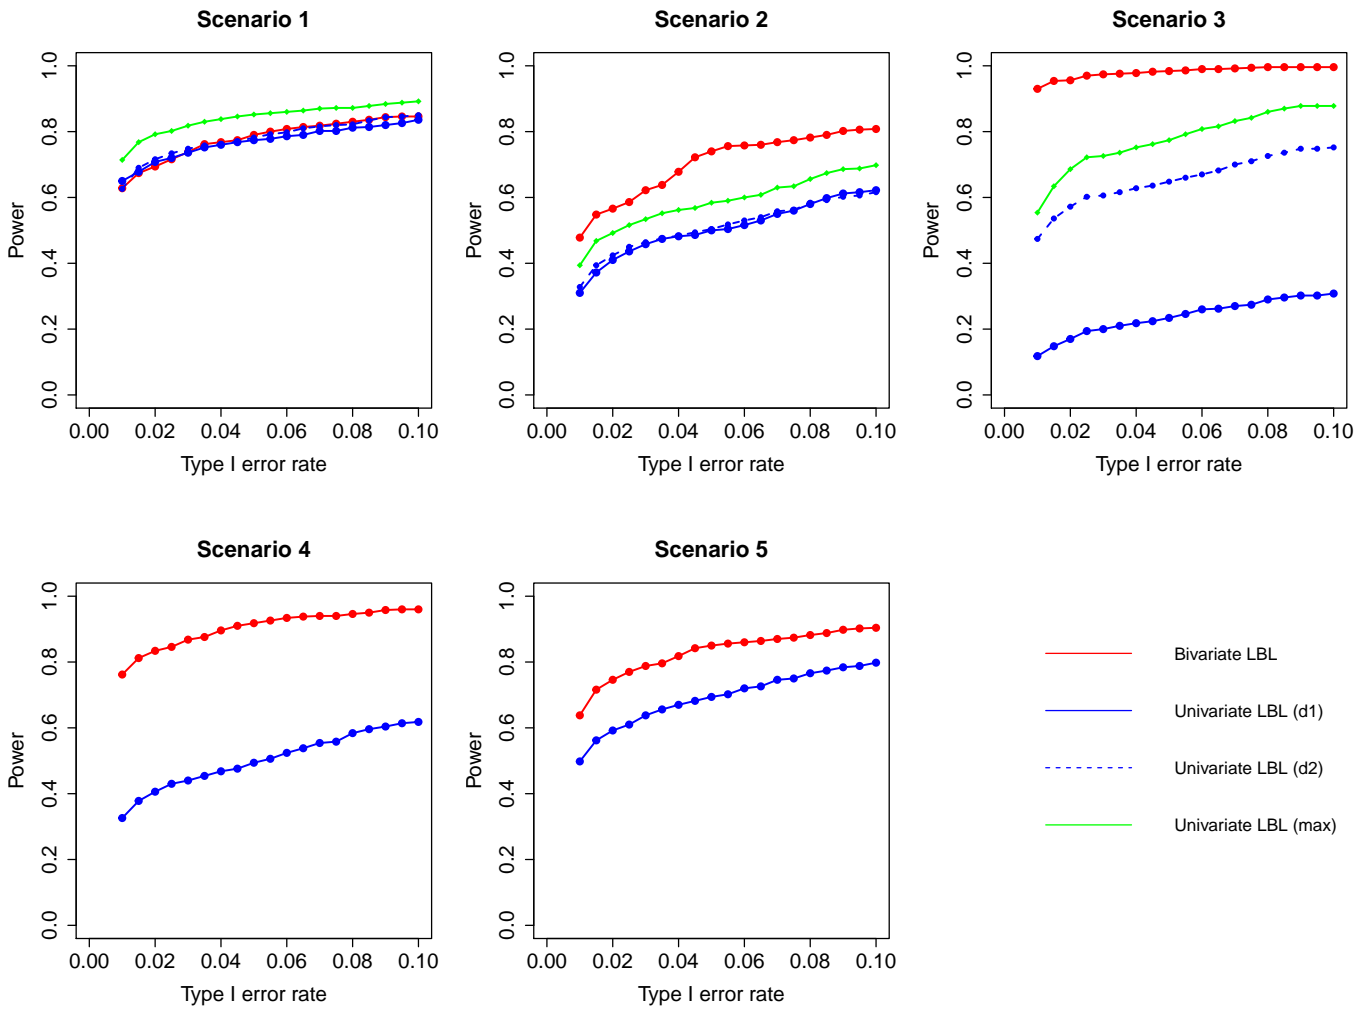

Figure S4: Simulation results for hypothesis 1 under setting 2 (9 haplotypes) and  $\rho = 0.99$ . The scenarios are listed in Table 1. d1=disease 1, d2=disease 2.

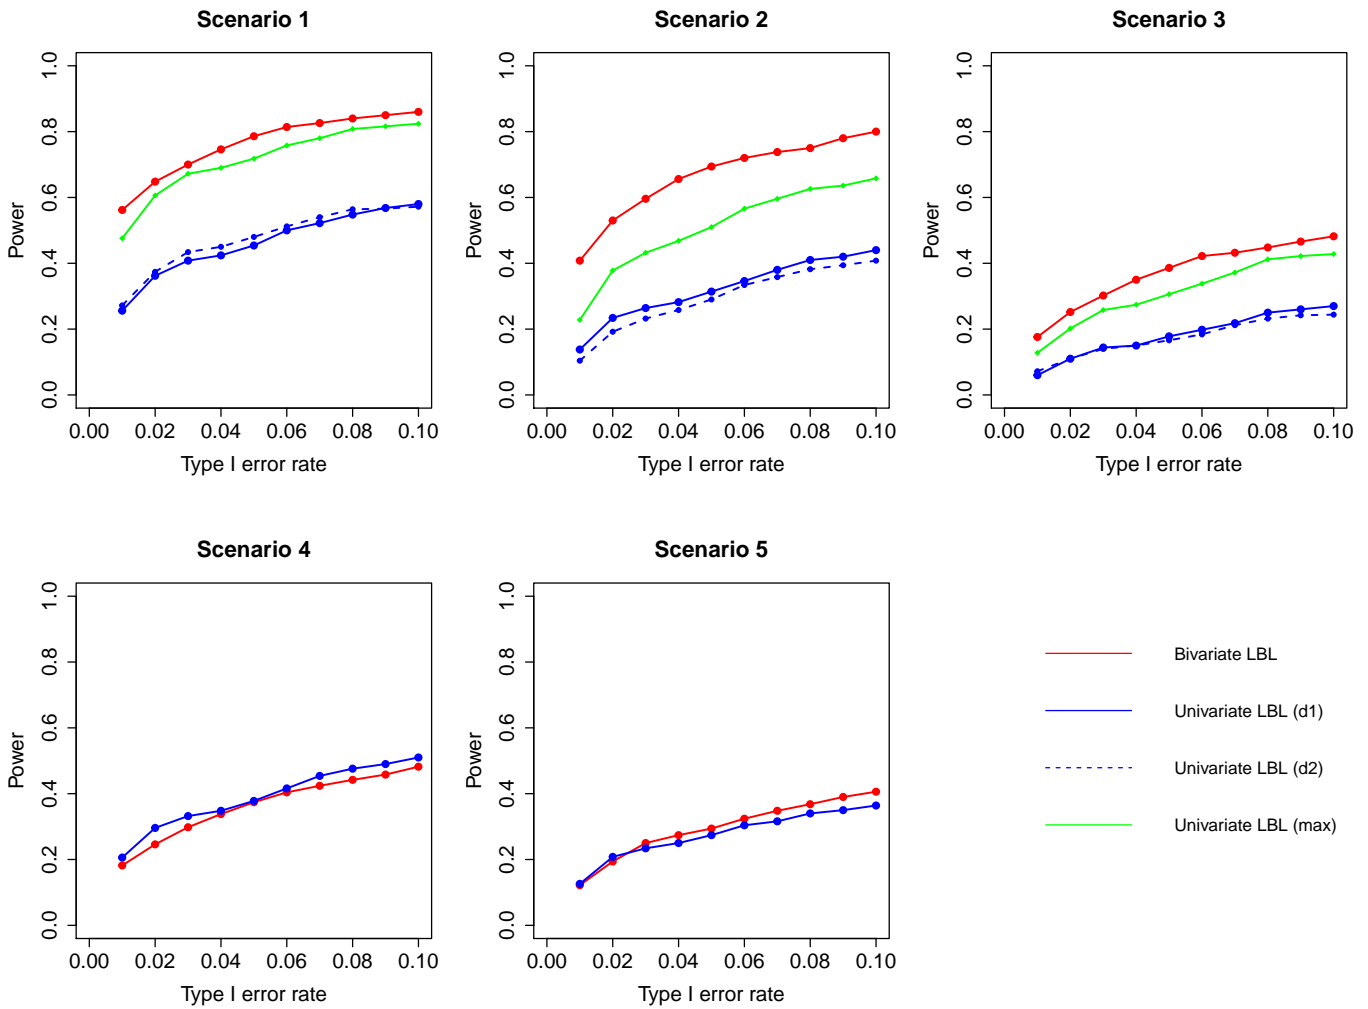

Figure S5: Simulation results for hypothesis 2 under setting 2 (9 haplotypes) and  $\rho = 0$ . The scenarios are listed in Table 1. d1=disease 1, d2=disease 2.

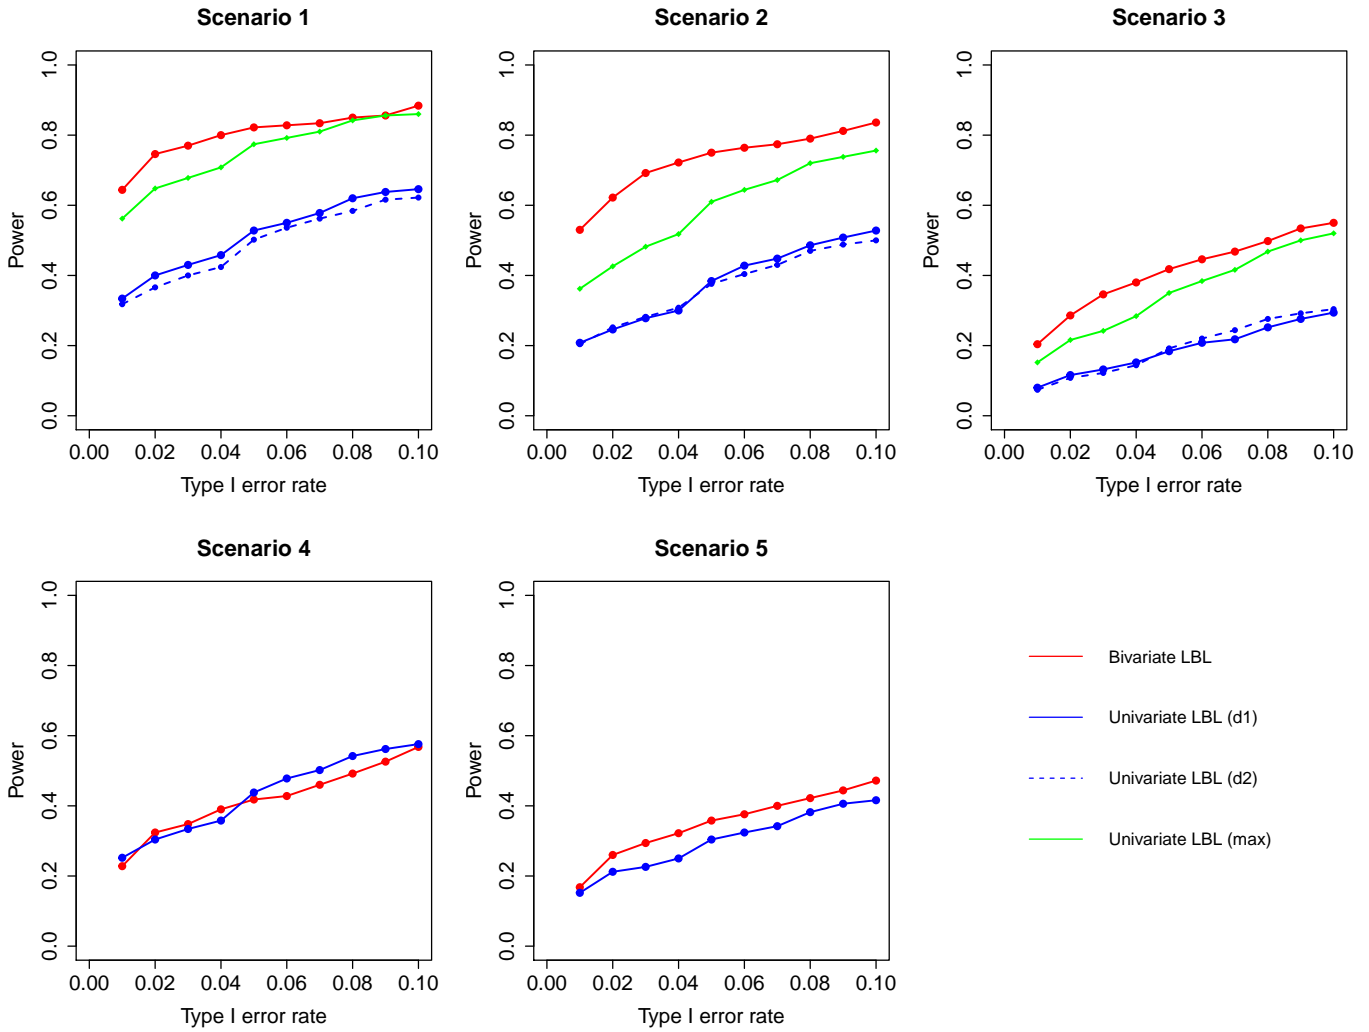

Figure S6: Simulation results for hypothesis 2 under setting 2 (9 haplotypes) and  $\rho = 0.3$ . The scenarios are listed in Table 1. d1=disease 1, d2=disease 2.



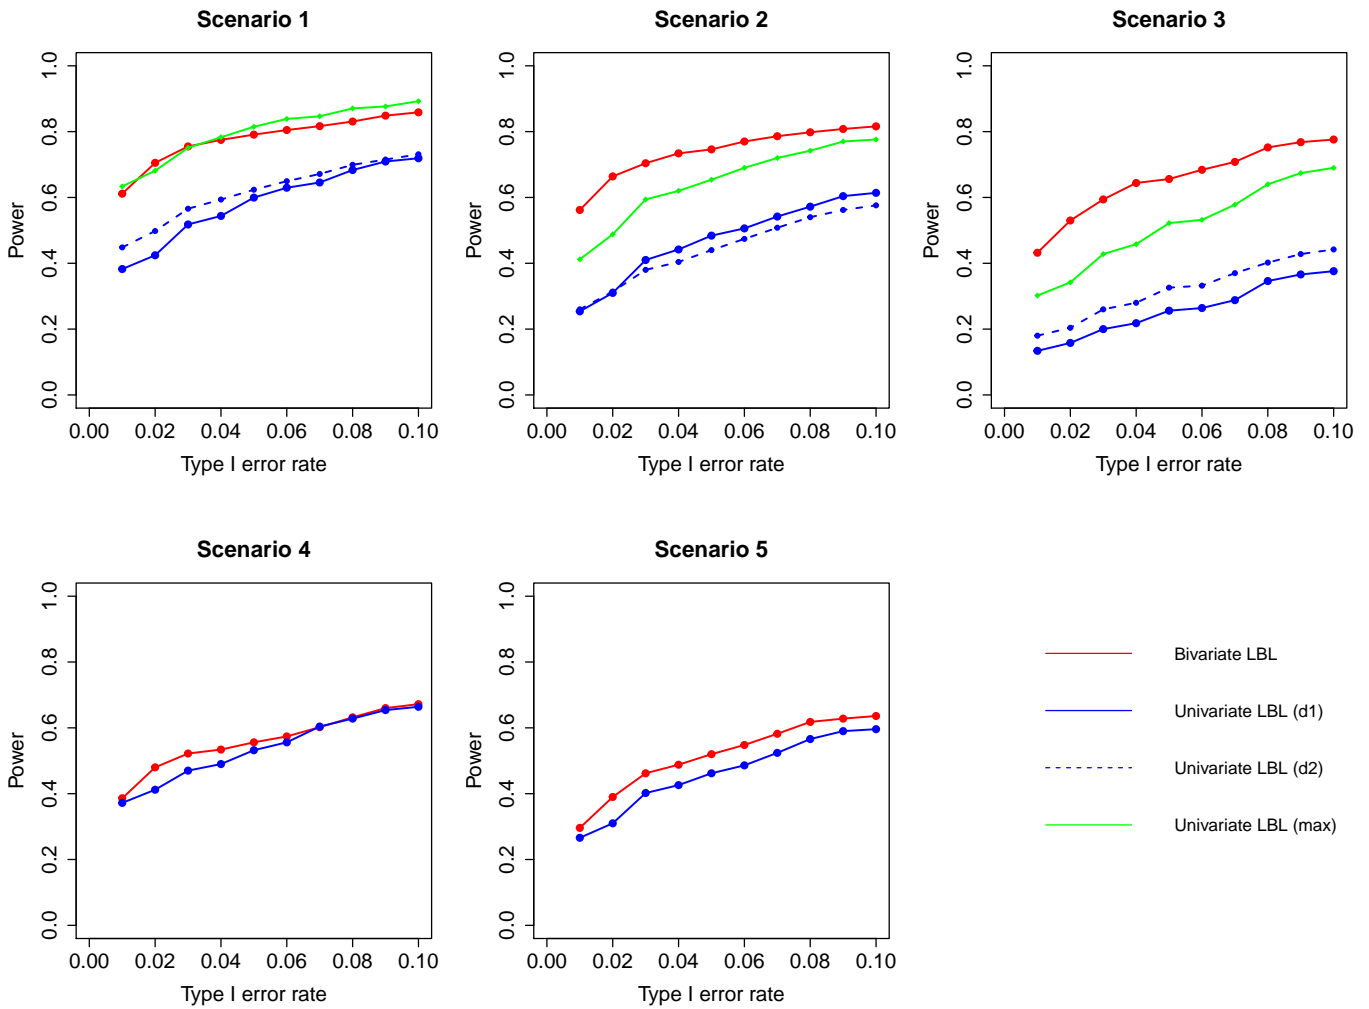

Figure S7: Simulation results for hypothesis 2 under setting 2 (9 haplotypes) and  $\rho = 0.7$ . The scenarios are listed in Table 1. d1=disease 1, d2=disease 2.

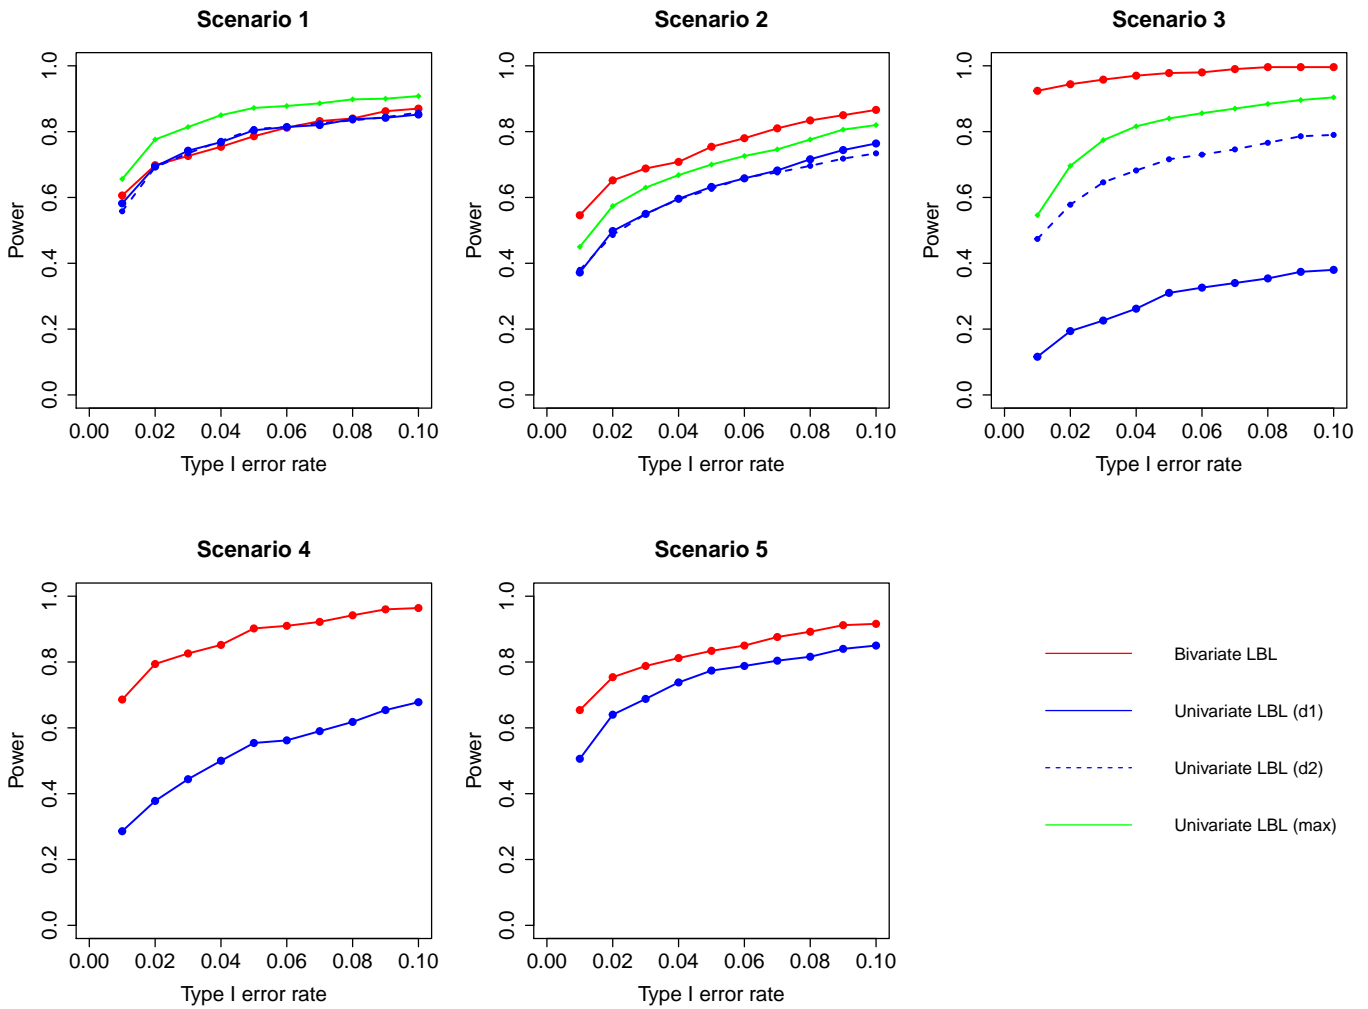

Figure S8: Simulation results for hypothesis 2 under setting 2 (9 haplotypes) and  $\rho = 0.99$ . The scenarios are listed in Table 1. d1=disease 1, d2=disease 2.

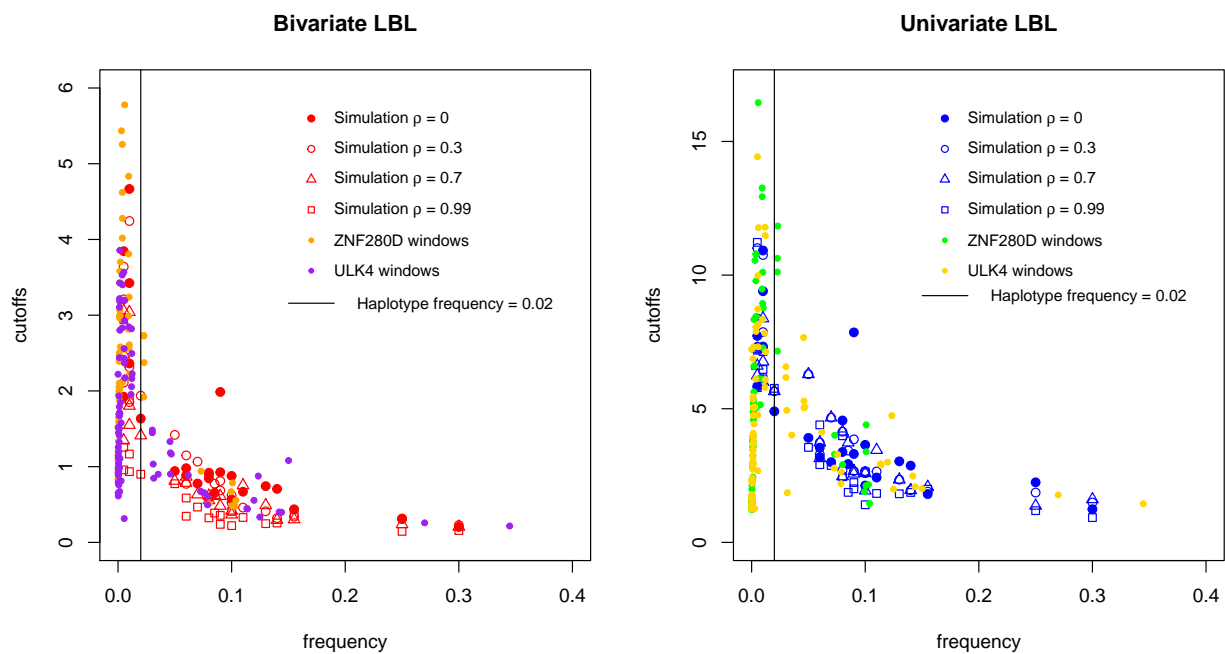

Figure S9: Cutoffs for BF vs. haplotype frequency. Cutoffs corresponding to type I error rate of 0.01 obtained from simulated data and GAW19 data on ULK4 and ZNF280D genes. A haplotype is considered rare if its frequency is less than or equal to 0.02.

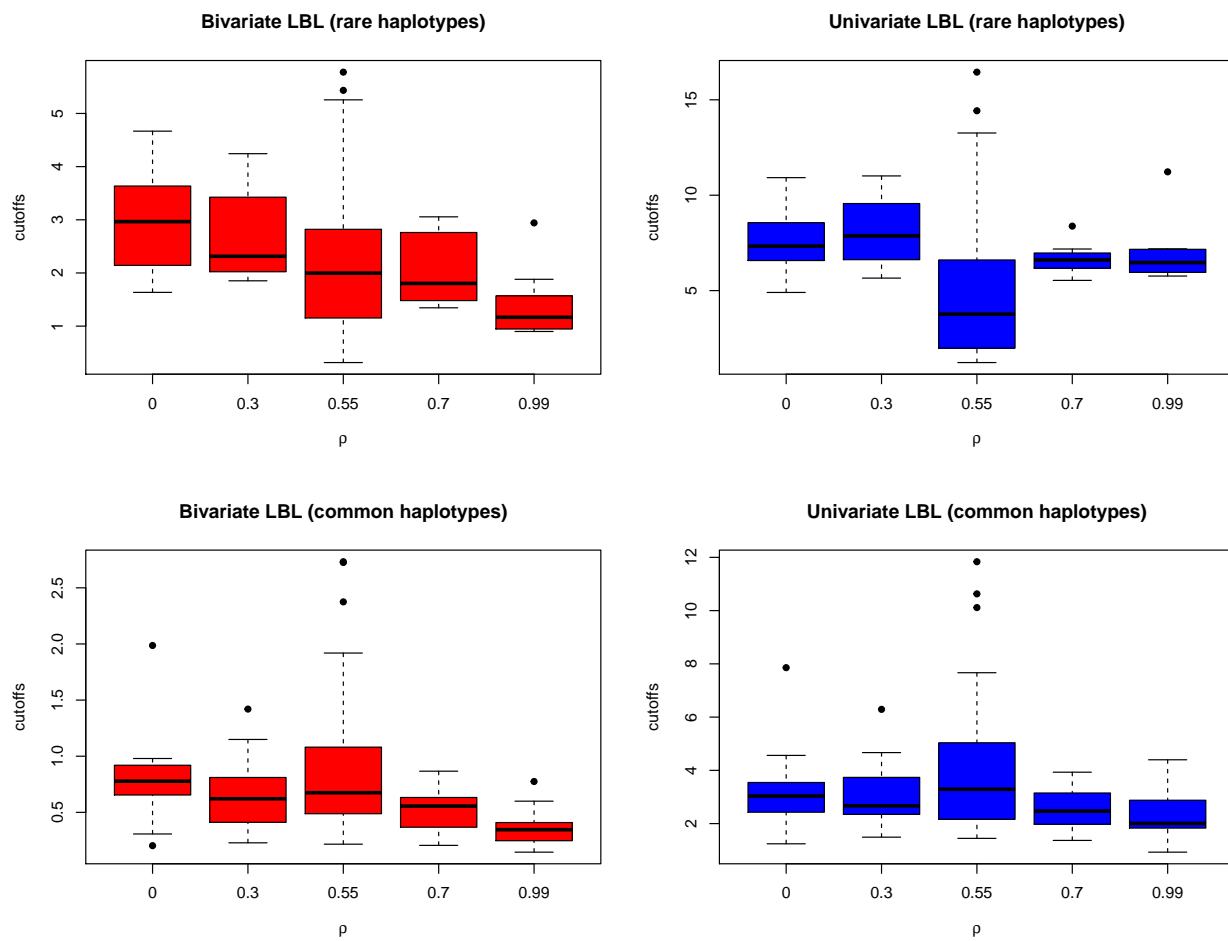

Figure S10: Cutoffs for BF vs. correlation coefficient,  $\rho$ . Cutoffs correspond to type I error rate of 0.01 obtained from simulated data and GAW19 data on ULK4 and ZNF280D genes. A haplotype is considered rare if its frequency is less than or equal to 0.02.

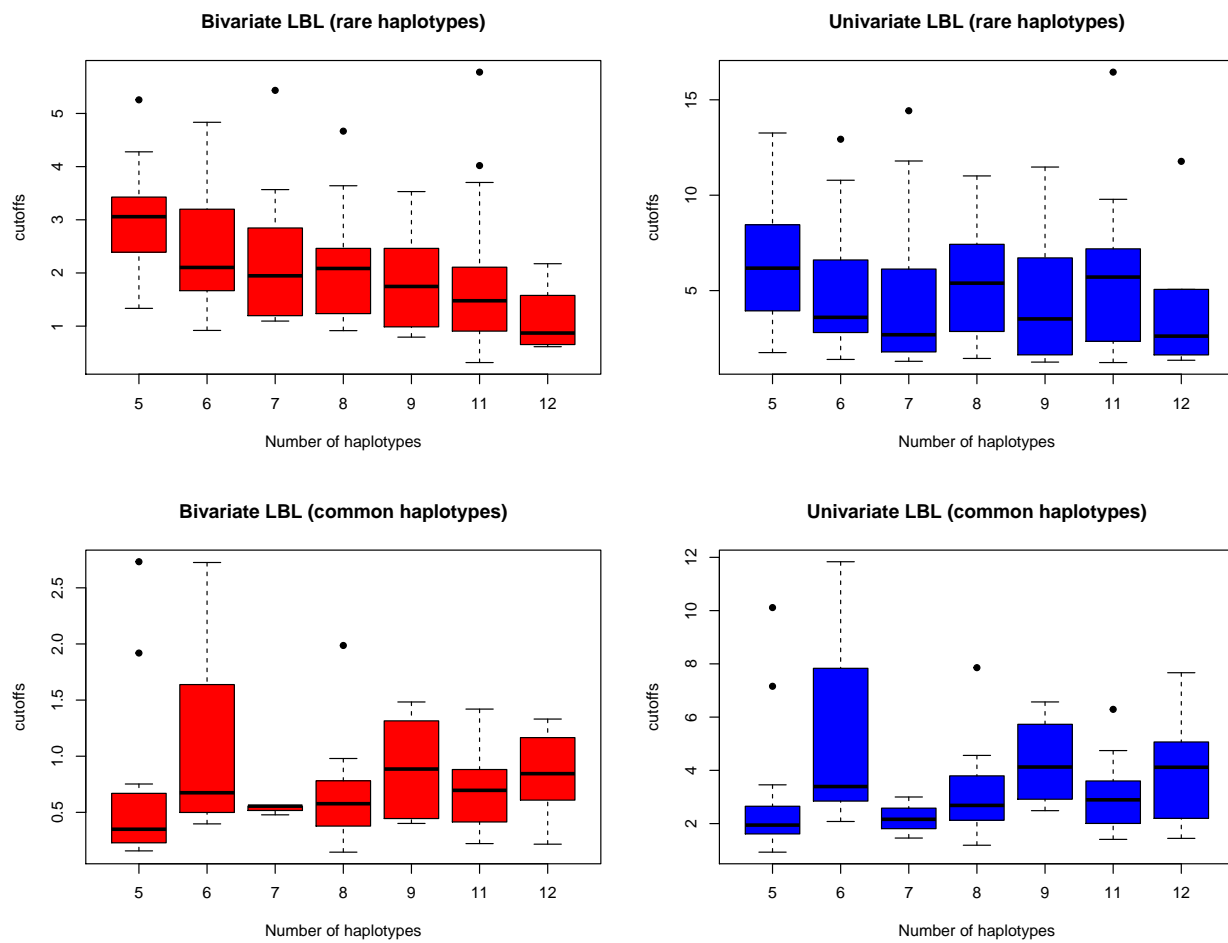

Figure S11: Cutoffs for BF vs. Number of haplotypes in the corresponding haplotype block. Cutoffs correspond to type I error rate of 0.01 obtained from simulated data and GAW19 data on ULK4 and ZNF280D genes. A haplotype is considered rare if its frequency is less than or equal to 0.02.
